1  
2  
3  
4  
5  
6  
7  
8  
9  
10  
11  
12  
13  
14  
15  
16  
17  
18  
19  
20  
21  
22  
23  
24  
25  
26  
27  
28  
29

***Enterococcus faecalis* and pathogenic streptococci inactivate daptomycin by releasing phospholipids**

Elizabeth V. K. Ledger<sup>1</sup>, Vera Pader<sup>1</sup> and Andrew M. Edwards<sup>1\*</sup>

<sup>1</sup> MRC Centre for Molecular Bacteriology and Infection, Imperial College London, Armstrong Rd, London, SW7 2AZ, UK.

\* For correspondence:

Tel: 0044 (0)207 594 2072

Fax: 0044 (0)207 594 3096

a.edwards@imperial.ac.uk

30 **Summary**

31 Daptomycin is a lipopeptide antibiotic with activity against Gram-positive bacteria. We have  
32 shown previously that *Staphylococcus aureus* can survive daptomycin exposure by releasing  
33 membrane phospholipids that inactivate the antibiotic. To determine whether other  
34 pathogens possess this defence mechanism, phospholipid release and daptomycin activity  
35 were measured after incubation of *Staphylococcus epidermidis*, Group A or B streptococci,  
36 *Streptococcus gordonii* or *Enterococcus faecalis* with the antibiotic. All bacteria released  
37 phospholipid in response to daptomycin, which resulted in at least partial inactivation of the  
38 antibiotic. However, *E. faecalis* showed the highest levels of lipid release and daptomycin  
39 inactivation. As shown previously for *S. aureus*, phospholipid release by *E. faecalis* was  
40 inhibited by the lipid biosynthesis inhibitor platensimycin. In conclusion, several pathogenic  
41 Gram-positive bacteria, including *E. faecalis*, inactivate daptomycin by releasing  
42 phospholipids, which may contribute to the failure of daptomycin to resolve infections caused  
43 by these pathogens.

44  
45  
46  
47  
48  
49  
50  
51  
52  
53  
54  
55  
56  
57  
58  
59

60 **Manuscript text**

61 Daptomycin is a lipopeptide antibiotic used as a last resort in the treatment of infections  
62 caused by methicillin-resistant *Staphylococcus aureus* (MRSA) and vancomycin-resistant  
63 enterococci (VRE) [1-3]. The use of daptomycin is becoming more common, with prescriptions  
64 increasing 72 % between 2012 and 2015 in the UK [4]. Daptomycin is the only lipopeptide  
65 antibiotic used clinically and functions in a similar manner to antimicrobial peptides [5]. The  
66 antibiotic inserts into the membrane of Gram-positive bacteria by targeting  
67 phosphatidylglycerol, where it forms oligomeric complexes [6-8]. The precise mechanism by  
68 which the antibiotic kills bacteria is unclear, but involves depolarisation of the bacterial  
69 membrane and inhibition of cell wall biosynthesis without causing lysis [8-13]. Although  
70 daptomycin resistance is rare, treatment failure occurs in up to 30 % of staphylococcal  
71 infections and 23 % of enterococcal infections [14,15]. Failure rates are highest in invasive  
72 infections such as bacteraemia or osteomyelitis, with rates of 24 % and 33 % respectively,  
73 resulting in poor patient prognoses [14]. Understanding the reasons for this treatment failure  
74 is crucial to improving the effectiveness of daptomycin treatment.

75 We recently discovered that *S. aureus* has a transient defence mechanism against  
76 daptomycin, which contributed to treatment failure in a murine model of invasive infection  
77 [16]. In response to the antibiotic, phospholipids were released from the cell membrane  
78 which sequestered daptomycin and abrogated its bactericidal activity [16]. Phospholipid  
79 release occurred via an active process, which was blocked by the lipid biosynthesis inhibitor  
80 platensimycin [16,17]. In addition to daptomycin, phospholipid shedding also provided  
81 protection against the antimicrobial peptides nisin and melittin, suggesting a general defence  
82 against membrane-targeting antimicrobials [16].

83 It is currently unknown whether other Gram-positive bacteria release phospholipids  
84 in response to daptomycin, although membrane vesicles have been observed on the surface  
85 of *E. faecalis* cells exposed to daptomycin [18]. In addition, there is growing evidence that  
86 other Gram-positive pathogens, including Group A streptococci (GAS) and group B  
87 streptococci (GBS), release phospholipids from their surfaces in the form of extracellular  
88 vesicles [19,20]. Production of these membrane vesicles is increased in the presence of  
89 antimicrobials and, at least for GAS, are rich in phosphatidylglycerol, which was shown to be  
90 essential for daptomycin inactivation by *S. aureus* [16,19,21]. Therefore, we hypothesised

91 that phospholipid release is a common strategy amongst Gram-positive pathogens to resist  
92 membrane-acting antimicrobials.

93         Given the increasing use of daptomycin to treat enterococcal infections, the primary  
94 aim of this work was to determine whether enterococci release membrane phospholipids that  
95 inactivate the antibiotic. We also examined pathogenic streptococci, and *S. epidermidis*, as  
96 the rising tide of antibiotic resistance may necessitate the use of daptomycin to tackle these  
97 bacteria in the future.

98         We initially determined the daptomycin minimum inhibitory concentration (MIC) for  
99 a representative panel of Gram-positive pathogens: *S. aureus* SH1000 [22], *S. epidermidis*  
100 ATCC 12228 [23], GAS strain A40 [24]; GBS strains 515 [25] and COH1 [26]; *S. gordonii* strain  
101 Challis [27]; and *E. faecalis* strains JH2-2 [28] and OG1X [29]. Bacteria were grown in Muller  
102 Hinton Broth containing calcium (0.5 mM) and MIC determined by the broth microdilution  
103 approach [30]. The most susceptible species were the pathogenic GAS strain A40 (0.125  $\mu\text{g}$   
104  $\text{ml}^{-1}$ ), and GBS strains 515 (0.5  $\mu\text{g}$   $\text{ml}^{-1}$ ) and COH1 (0.5  $\mu\text{g}$   $\text{ml}^{-1}$ ), whilst *S. aureus* (1  $\mu\text{g}$   $\text{ml}^{-1}$ ), *S.*  
105 *epidermidis* (1  $\mu\text{g}$   $\text{ml}^{-1}$ ), *S. gordonii* Challis (2-4  $\mu\text{g}$   $\text{ml}^{-1}$ ) *E. faecalis* strains OG1X (2  $\mu\text{g}$   $\text{ml}^{-1}$ ) and  
106 JH2-2 (4  $\mu\text{g}$   $\text{ml}^{-1}$ ) were the least susceptible.

107         To determine whether *E. faecalis* or streptococci respond to daptomycin by releasing  
108 membrane phospholipids, we exposed streptococci and enterococci ( $10^8$  CFU  $\text{ml}^{-1}$ ) to various  
109 supra-MIC concentrations of the antibiotic (5-40  $\mu\text{g}$   $\text{ml}^{-1}$ ) in Brain-Heart Infusion (0.5 mM  
110  $\text{CaCl}_2$ ) broth at 37 °C under static conditions with 5%  $\text{CO}_2$  and measured bacterial survival,  
111 antibiotic activity and phospholipid release (Fig. 1c-h). Staphylococci were also exposed to  
112 daptomycin (5-40  $\mu\text{g}$   $\text{ml}^{-1}$ ), but in tryptic soy broth (TSB) containing 0.5 mM  $\text{CaCl}_2$  at 37 °C with  
113 shaking (180 RPM) (Fig. 1a,b).

114         For all strains, there was a dose-dependent decrease in survival after 8 h exposure to  
115 daptomycin, as assessed by CFU counts (Fig. 1a-h). However, as expected from the MIC data,  
116 survival of the two enterococcal strains, the staphylococci and *S. gordonii* was greater than  
117 survival of GAS or GBS strains at every concentration of daptomycin examined (Fig. 1a-h).

118         Using the phospholipid-reactive fluorescent dye FM-4-64 (Life Technologies), we  
119 found that daptomycin triggered phospholipid release from all of the bacteria examined,  
120 albeit to differing levels. The quantity of phospholipid released was much greater for  
121 staphylococci than the other species examined (Fig. 1i-p). However, for both staphylococci  
122 and streptococci, the quantity of phospholipid released was lowest when the daptomycin

123 concentration was highest, suggesting that the antibiotic may have killed the bacteria before  
124 they could release the lipid (Fig. 1i-p). By contrast, the enterococci released high levels of  
125 phospholipid in the presence of the highest concentrations of daptomycin (Fig. 1o,p). This  
126 may indicate different daptomycin concentration thresholds for triggering of phospholipid  
127 release.

128 To determine whether phospholipid release resulted in the inactivation of  
129 daptomycin, the activity of the antibiotic in the culture supernatants was measured using a  
130 previously described zone of inhibition assay [16] (Fig. 1q-x). Daptomycin was inactivated to  
131 varying degrees by the bacteria, depending on the concentration of the antibiotic used.  
132 However, both staphylococcal strains, both enterococcal strains, *S. gordonii* and the GAS  
133 strain completely inactivated daptomycin at 5  $\mu\text{g ml}^{-1}$ , but GBS strains only partially  
134 inactivated the antibiotic at this concentration. At 10  $\mu\text{g ml}^{-1}$  daptomycin, only the  
135 staphylococci, *S. gordonii* and the enterococci showed significant inactivation of the antibiotic  
136 and at a concentration of 20  $\mu\text{g ml}^{-1}$  daptomycin, only staphylococci and enterococci  
137 inactivated the antibiotic to any significant degree, with a loss of 30-60% of antibiotic activity.  
138 However, despite triggering phospholipid release, at 40  $\mu\text{g ml}^{-1}$  daptomycin there was  
139 relatively little (<20%) inactivation of the antibiotic by any of the bacteria tested. Therefore,  
140 phospholipid release is finite and can be overcome with a sufficiently high dose of  
141 daptomycin.

142 These data extend our previous finding that *S. aureus* releases phospholipid in  
143 response to daptomycin and that this results in inactivation of the antibiotic by revealing a  
144 very similar phenotype for *S. epidermidis*. These data also support the previous observation  
145 that *E. faecalis* releases phospholipid in response to daptomycin [18], and show that this  
146 phospholipid release correlates with daptomycin inactivation and bacterial survival.  
147 Streptococci, particularly *S. gordonii*, also released phospholipid and inactivated daptomycin,  
148 albeit less efficiently than *E. faecalis*. Therefore, daptomycin-induced phospholipid release  
149 appears to be a conserved mechanism across Gram-positive pathogens.

150 Next, we wanted to explore whether the mechanism of phospholipid release and  
151 daptomycin inactivation by enterococci and streptococci was similar to that of *S. aureus*.  
152 Therefore, we undertook further experiments with *E. faecalis*, which was most efficient of the  
153 enterococci and streptococci at releasing phospholipid and inactivating daptomycin, and *S.*  
154 *aureus*, in which daptomycin-triggered phospholipid release has been well characterised [16].

155 In *S. aureus*, daptomycin-triggered phospholipid release is an active process that  
156 requires energy, as well as protein and lipid biosynthesis [16]. To determine whether  
157 phospholipid release by *E. faecalis* exposed to daptomycin was occurring via an active  
158 process, or simply a consequence of damage caused by the antibiotic, bacteria were exposed  
159 to the antibiotic in the presence or absence of a sub-inhibitory concentration of the  
160 phospholipid biosynthesis inhibitor platensimycin [17]. As described previously, exposure of  
161 *S. aureus* to daptomycin ( $10 \mu\text{g ml}^{-1}$ ) resulted in increased phospholipid in the supernatant  
162 but this was significantly reduced in the presence of platensimycin at half the MIC ( $0.25 \mu\text{g}$   
163  $\text{ml}^{-1}$ ) (Fig. 2a). Similarly, phospholipid was released upon exposure of *E. faecalis* to daptomycin  
164 ( $10 \mu\text{g ml}^{-1}$ ), but this was blocked when platensimycin was present at half the MIC ( $0.5 \mu\text{g ml}^{-1}$ )  
165 (Fig. 2b). The presence of platensimycin prevented *S. aureus* from inactivating daptomycin  
166 (Fig. 2c) and significantly reduced the ability of *E. faecalis* to inactivate daptomycin (Fig. 2d).  
167 This confirmed that daptomycin-induced phospholipid release by *E. faecalis* is an active  
168 process that requires *de novo* lipid biosynthesis and is not simply a consequence of membrane  
169 damage caused by the antibiotic. The ability of platensimycin to block phospholipid release  
170 and prevent daptomycin inactivation by *E. faecalis* also provided strong evidence that, as for  
171 *S. aureus*, daptomycin activity is blocked by the phospholipid in the supernatant. However, it  
172 was necessary to rule out an alternative hypothesis; that the loss daptomycin inactivation was  
173 simply due to binding of the antibiotic to the bacterial surface.

174 To measure binding of daptomycin to bacteria, daptomycin was labelled with the  
175 Bodipy fluorophore (Life Technologies) as described previously [11,16]. As reported  
176 previously, a killing assay with *E. faecalis* indicated that the labelled antibiotic had slightly  
177 altered bactericidal activity relative to unlabelled daptomycin [11] (Fig 3a). However, as  
178 described above for unlabelled antibiotic (Fig. 1q,x), the activity of the antibiotic decreased  
179 after incubation with *E. faecalis* or *S. aureus* (Fig. 3b), confirming that the Bodipy label does  
180 not significantly affect the interaction of the antibiotic with the bacteria studied.

181 After 8 h incubation with Bodipy-daptomycin, bacterial cells were pelleted and the  
182 fluorescence of both the cells and the supernatants was measured separately using a Tecan  
183 microplate reader with excitation at 502 nm and emission at 510 nm. Antibiotic attachment  
184 to the *E. faecalis* cellular fraction was similar for both Bodipy-daptomycin concentrations  
185 examined, suggesting saturated binding to cells (Fig. 3c). However, most of the antibiotic  
186 remained in the supernatant (Fig. 3d). By comparison, Bodipy-daptomycin bound *S. aureus*

187 more strongly than *E. faecalis*, with higher levels of fluorescence associated with bacterial  
188 cells and a corresponding drop in the fluorescence of the supernatant (Fig. 3c,d). This  
189 difference in antibiotic binding may explain why the daptomycin MIC of the *E. faecalis* strains  
190 used here (2-4  $\mu\text{g ml}^{-1}$ ) is higher than that of the *S. aureus* strain examined (1  $\mu\text{g ml}^{-1}$ ) and why  
191 daptomycin triggers greater phospholipid release from staphylococci than enterococci.

192 Together, these data confirmed that the loss of daptomycin activity in *E. faecalis*  
193 cultures was not due to binding of the antibiotic to the bacterial surface or the plastic vessels  
194 used in the assays. However, as a final confirmation that phospholipid released from *E.*  
195 *faecalis* inactivated daptomycin, we exposed the bacterium to daptomycin (5  $\mu\text{g ml}^{-1}$ ) to  
196 trigger phospholipid release, collected the cell-free culture supernatant and added a second  
197 dose of the antibiotic (5  $\mu\text{g ml}^{-1}$ ). The culture supernatant containing the released  
198 phospholipids significantly reduced the activity of the second dose of daptomycin (by ~25%,  
199 Fig. 3e). Therefore, as described for *S. aureus*, the release of phospholipids by *E. faecalis* in  
200 response to daptomycin inactivates the antibiotic. The data described above also indicate that  
201 several species of streptococci release phospholipids in response to daptomycin, which  
202 inactivate the antibiotic, albeit to a lesser extent than *E. faecalis* or *S. aureus*.

203 Streptococci and enterococci cause a range of serious diseases, including septicaemia  
204 and endocarditis, which can be treated by daptomycin, especially when the pathogen is multi-  
205 drug resistant or the patient has a  $\beta$ -lactam allergy [1,31]. The presence of this defence  
206 mechanism in a variety of clinically-relevant Gram-positive bacteria indicates that it is  
207 conserved and could be a viable target to improve the effectiveness of daptomycin therapy  
208 against these pathogens.

209 In this work, we focussed on daptomycin because it is a last resort antibiotic and is  
210 associated with high rates of treatment failure. However, whilst daptomycin use is increasing,  
211 it is very unlikely to have provided the selection pressure for the evolution of the phospholipid  
212 release defence mechanism described here and previously [16]. Since cationic antimicrobial  
213 peptides (cAMPs) act via a similar mechanism to daptomycin in targeting the Gram-positive  
214 cell membrane [5] we hypothesise that these host defence molecules have likely driven the  
215 evolution of phospholipid release as a defence mechanism.

216 The discovery of phospholipid release in several Gram-positive pathogens expands our  
217 growing appreciation of broad-spectrum extracellular defence mechanisms that protect  
218 bacteria against antibiotics or host defences. For example, previous work has shown that the

219 production of outer-membrane vesicles by *E. coli* can protect against membrane-acting  
220 antimicrobials such as polymixin E and colistin [32], whilst another report revealed that  
221 lipochalins released by *Burkholderia* can sequester several different antibiotics [33]. These  
222 findings underline the complex nature of innate antibiotic resistance, but also provide  
223 opportunities for mechanistic insight and improved therapeutic approaches. For example, in  
224 this report and previously, we have shown that inhibition of phospholipid biosynthesis using  
225 platensimycin prevents the inactivation of daptomycin by both *S. aureus* and *E. faecalis* [16].  
226 Although platensimycin has not entered clinical trials due to poor pharmacokinetic properties  
227 [17,34], other inhibitors of lipid biosynthesis are in clinical development [35]. Therefore, the  
228 use of daptomycin in combination with lipid biosynthesis inhibitors may provide an effective  
229 way of enhancing treatment outcomes compared to the lipopeptide antibiotic alone.

230 In summary, we have demonstrated that *Enterococcus faecalis* releases phospholipids  
231 in response to daptomycin via an active mechanism requiring *de novo* lipid biosynthesis and  
232 that these phospholipids inactivate daptomycin. Pathogenic streptococci also appear to be  
233 capable of inactivating daptomycin by releasing phospholipids, indicating that this mechanism  
234 is conserved amongst Gram-positive pathogens.

235

236

237

238

239

## 240 **Acknowledgements**

241 Mal Horsburgh (University of Liverpool) and Angela Nobbs (University of Bristol) are  
242 acknowledged for kindly providing strains. E.V.K.L. is supported by a Wellcome Trust PhD  
243 studentship through an award to Imperial College. A.M.E. acknowledges funding from the  
244 Royal Society, Department of Medicine and from the Imperial NIHR Biomedical Research  
245 Centre, Imperial College London.

246



247 **References**

248  
249  
250  
251  
252  
253  
254  
255  
256  
257  
258  
259  
260  
261  
262  
263  
264  
265  
266  
267  
268  
269  
270  
271  
272  
273  
274  
275  
276  
277  
278  
279  
280  
281  
282  
283  
284  
285  
286  
287  
288  
289  
290  
291  
292  
293

1. **Humphries RM, Pollett S, Sakoulas G.** A Current Perspective on Daptomycin for the Clinical Microbiologist. *Clin Microbiol Rev* 2013;**26**:759-780.
2. **Purrello S M, Garau J, Giamarellos E, Mazzei T, Pea F, et al.** Methicillin-resistant *Staphylococcus aureus* infections: A review of the currently available treatment options. *J Glob Antimicrob Resist* 2016;**7**:178-186.
3. **Seaton RA, Gonzalez-Ruiz A, Cleveland KO, Couch KA, Pathan R, Hamed K.** Real-world daptomycin use across wide geographical regions: results from a pooled analysis of CORE and EU-CORE. *Ann Clin Microbiol Antimicrob* 2016;**15**:18-016-0130-8.
4. **Public Health England.** *English surveillance programme for antimicrobial utilisation and resistance (ESPAUR)* 2016.
5. **Straus SK, Hancock RE.** Mode of action of the new antibiotic for Gram-positive pathogens daptomycin: comparison with cationic antimicrobial peptides and lipopeptides. *Biochim Biophys Acta* 2006;**1758**:1215-1223.
6. **Muraih JK, Pearson A, Silverman J, Palmer M.** Oligomerization of daptomycin on membranes. *Biochim Biophys Acta* 2011;**1808**:1154-1160.
7. **Muraih JK, Harris J, Taylor SD, Palmer M.** Characterization of daptomycin oligomerization with perylene excimer fluorescence: stoichiometric binding of phosphatidylglycerol triggers oligomer formation. *Biochim Biophys Acta* 2012;**1818**:673-678.
8. **Taylor SD, Palmer M.** The action mechanism of daptomycin. *Bioorg Med Chem* 2016;**24**:6253-6268.
9. **Silverman JA, Perlmutter NG, Shapiro HM.** Correlation of daptomycin bactericidal activity and membrane depolarization in *Staphylococcus aureus*. *Antimicrob Agents Chemother* 2003;**47**:2538-2544.
10. **Cotroneo N, Harris R, Perlmutter N, Beveridge T, Silverman JA.** Daptomycin exerts bactericidal activity without lysis of *Staphylococcus aureus*. *Antimicrob Agents Chemother* 2008;**52**:2223-2225.
11. **Pogliano J, Pogliano N, Silverman JA.** Daptomycin-mediated reorganization of membrane architecture causes mislocalization of essential cell division proteins. *J Bacteriol* 2012;**194**:4494-4504.
12. **Müller A, Wenzel M, Strahl H, Grein F, Saaki TN, et al.** Daptomycin inhibits cell envelope synthesis by interfering with fluid membrane microdomains. *Proc Natl Acad Sci U S A* pii: 201611173 2016 (In press).

- 294  
295  
296  
297  
298  
299  
300  
301  
302  
303  
304  
305  
306  
307  
308  
309  
310  
311  
312  
313  
314  
315  
316  
317  
318  
319  
320  
321  
322  
323  
324  
325  
326  
327  
328  
329  
330  
331  
332  
333  
334  
335  
336  
337  
338
13. **Pader V, Edwards AM.** Daptomycin: new insights into an antibiotic of last resort. *Future Microbiol* 2017;**12**:461-464.
  14. **Seaton RA, Menichetti F, Dalekos G, Beiras-Fernandez A, Nacinovich F, et al.** Evaluation of Effectiveness and Safety of High-Dose Daptomycin: Results from Patients Included in the European Cubicin((R)) Outcomes Registry and Experience. *Adv Ther* 2015;**32**:1192-1205.
  15. **Tran TT, Munita JM, Arias CA.** Mechanisms of drug resistance: daptomycin resistance. *Ann N Y Acad Sci* 2015;**1354**:32-53.
  16. **Pader V, Hakim S, Painter KL, Wigneshweraraj S, Clarke TB, Edwards AM.** *Staphylococcus aureus* inactivates daptomycin by releasing membrane phospholipids. *Nat Microbiol* 2016;**2**:16194.
  17. **Wang J, Soisson SM, Young K, Shoop W, Kodali S, Galgoci A. et al.** Platensimycin is a selective FabF inhibitor with potent antibiotic properties. *Nature* 2006;**441**:358-361.
  18. **Wale LJ, Shelton AP, Greenwood D.** Scanning electronmicroscopy of *Staphylococcus aureus* and *Enterococcus faecalis* exposed to daptomycin. *J Med Microbiol* 1989;**30**:45-49.
  19. **Biagini M, Garibaldi M, Aprea S, Pezzicoli A, Doro F, Becherelli, M. et al.** The Human Pathogen *Streptococcus pyogenes* Releases Lipoproteins as Lipoprotein-rich Membrane Vesicles. *Mol Cell Proteomics* 2015;**14**:2138-2149.
  20. **Surve MV, Anil A, Kamath KG, Bhutda S, Sthanam LK, Pradhan A. et al.** Membrane Vesicles of Group B *Streptococcus* Disrupt Feto-Maternal Barrier Leading to Preterm Birth. *PLoS Pathog* 2016;**12**:e1005816.
  21. **Uhlmann J, Rohde M, Siemens N, Kreikemeyer B, Bergman P, Johansson L, Norrby-Teglund A.** LL-37 Triggers Formation of *Streptococcus pyogenes* Extracellular Vesicle-Like Structures with Immune Stimulatory Properties. *J Innate Immun* 2016;**8**:243-257.
  22. **Horsburgh MJ, Aish JL, White IJ, Shaw L, Lithgow JK, Foster SJ.** sigmaB modulates virulence determinant expression and stress resistance: characterization of a functional *rsbU* strain derived from *Staphylococcus aureus* 8325-4. *J Bacteriol* 2002;**184**:5457-5467.
  23. **Zhang YQ, Ren SX, Li HL, Wang YX, Fu G et al.** Genome-based analysis of virulence genes in a non-biofilm-forming *Staphylococcus epidermidis* strain (ATCC 12228). *Mol Microbiol* 2003;**49**:1577-1593.

- 339 24. **Molinari G, Talay SR, Valentin-Weigand P, Rohde M, Chhatwal GS.** The fibronectin-  
340 binding protein of *Streptococcus pyogenes*, SfbI, is involved in the internalization of  
341 group A streptococci by epithelial cells. *Infect Immun* 1997;65:1357-1363.  
342
- 343 25. **Wessels MR, Paoletti LC, Rodewald AK, Michon F, DiFabio J, Jennings HJ, Kasper DL.**  
344 Stimulation of protective antibodies against type Ia and Ib group B streptococci by a  
345 type Ia polysaccharide-tetanus toxoid conjugate vaccine. *Infect Immun*  
346 1993;61:4760-4766.  
347
- 348 26. **Wilson CB, Weaver WM.** Comparative susceptibility of group B streptococci and  
349 *Staphylococcus aureus* to killing by oxygen metabolites. *J Infect Dis* 1985;152:323-  
350 329.  
351
- 352 27. **Cisar JO, Kolenbrander PE, McIntire FC.** Specificity of coaggregation reactions  
353 between human oral streptococci and strains of *Actinomyces viscosus* or  
354 *Actinomyces naeslundii*. *Infect Immun* 1979;24:742-752.  
355
- 356 28. **Jacob AE, Hobbs SJ.** Conjugal transfer of plasmid-borne multiple antibiotic resistance  
357 in *Streptococcus faecalis* var. *zymogenes*. *J Bacteriol* 1974;117:360-372.  
358
- 359 29. **Ike Y, Craig RA, White BA, Yagi Y, Clewell DB.** Modification of *Streptococcus faecalis*  
360 sex pheromones after acquisition of plasmid DNA. *Proc Natl Acad Sci U S A*  
361 1983;80:5369-5373.  
362
- 363 30. **Clinical and Laboratory Standards Institute.** Methods for Dilution Antimicrobial  
364 Susceptibility Tests for Bacteria That Grow Aerobically; Approved Standard—Ninth  
365 Edition. CLSI document M07-A9. Wayne, PA. 2012.  
366
- 367 31. **King A, Phillips I.** The *in vitro* activity of daptomycin against 514 Gram-positive  
368 aerobic clinical isolates. *J Antimicrob Chemother* 2001;48:219-223.  
369
- 370 32. **Manning AJ & Kuehn MJ.** Contribution of bacterial outer membrane vesicles to  
371 innate bacterial defense. *BMC Microbiol* 2011;11:258.  
372
- 373 33. **El-Halfawy OM, Klett J, Ingram RJ, Loutet SA, Murphy ME.** Antibiotic Capture by  
374 Bacterial Lipocalins Uncovers an Extracellular Mechanism of Intrinsic Antibiotic  
375 Resistance. *MBio* 2017;8: e00225-17.  
376
- 377 34. **Martens E, Demain AL.** Platensimycin and platencin: promising antibiotics for future  
378 application in human medicine. *J Antibiot* 2011;11:705-710.  
379
- 380 35. **Yao J, Rock CO.** Bacterial fatty acid metabolism in modern antibiotic discovery.  
381 *Biochim Biophys Acta* 2016; In press.  
382  
383  
384  
385

386 **Figures and figure legends**

387

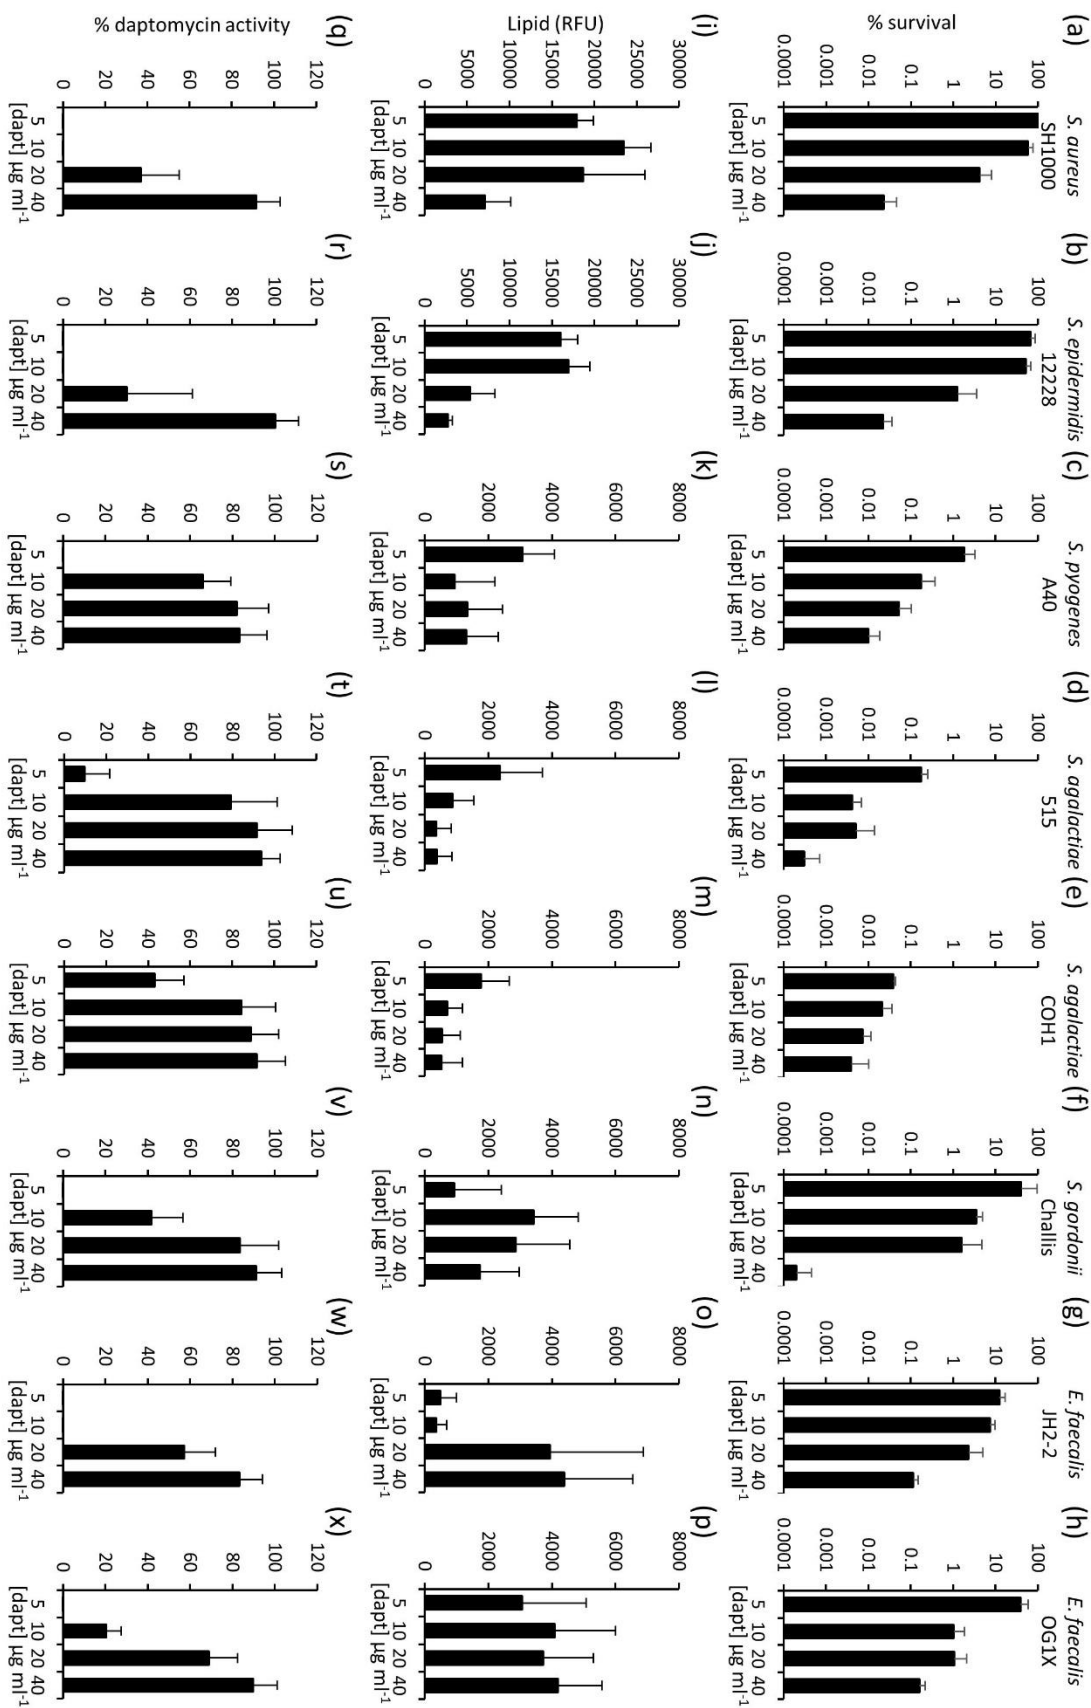

388

389 **Fig. 1.** Streptococci and enterococci release phospholipid and inactivate daptomycin.  
390 (a-h), percentage survival of bacteria after 8 h incubation in broth containing the indicated  
391 concentrations of daptomycin. (i-p) the concentration of phospholipid in culture supernatants  
392 of bacteria exposed to daptomycin as determined by reactivity with a fluorescent dye (RFU:  
393 relative fluorescence units). Note the different Y-axis scale for staphylococci vs other bacteria.  
394 (q-x) relative percentage of daptomycin activity remaining in culture supernatants of bacteria  
395 exposed to daptomycin for 8 h. The activity of daptomycin incubated in culture medium only  
396 for 8 h was taken to be 100 %. For all data, the mean of 4 independent experiments are shown,  
397 and error bars represent the standard deviation of the mean.

398  
399  
400  
401  
402  
403  
404  
405  
406  
407  
408  
409  
410  
411  
412  
413  
414  
415  
416  
417  
418  
419  
420

421

422

423

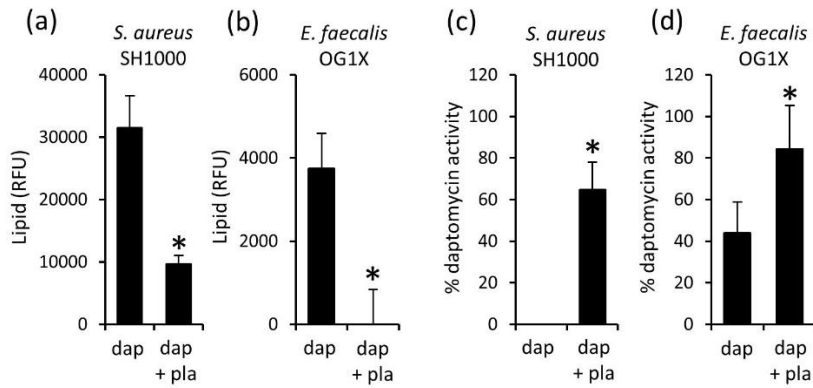

424

425

426 **Fig. 2.** *De novo* lipid biosynthesis is required for enterococcal inactivation of daptomycin.

427 Phospholipid concentration (RFU) in culture supernatants from *S. aureus* (a) or *E. faecalis*

428 OG1X (b) incubated for 8 h in media containing daptomycin ( $10 \mu\text{g ml}^{-1}$ ) only (dap) or both

429 daptomycin and 0.5 X MIC platensimicin (dap + pla). (c,d) relative % daptomycin activity in

430 supernatants from cultures described in (a) and (b), respectively. Data in (a) and (b) were

431 analysed using a one-way ANOVA with Tukey's post-hoc test. Data in (c) and (d) were analysed

432 by a Student's *t*-test. \* $P < 0.05$ .

433

434

435

436

437

438

439

440

441

442

443

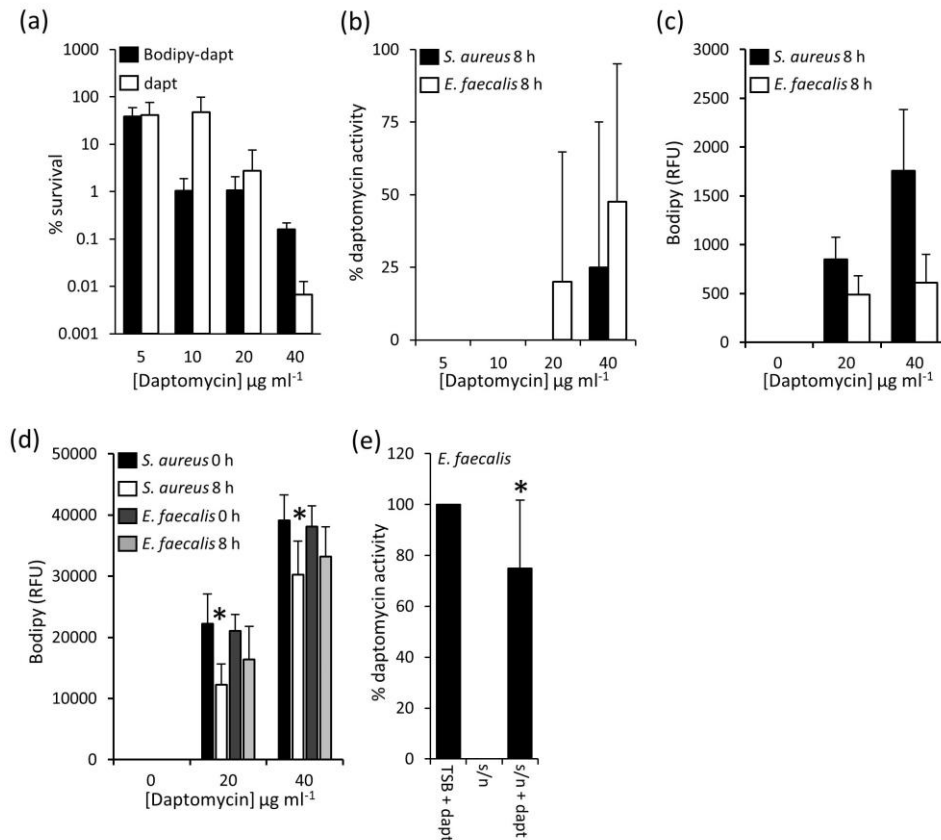

444

445 **Fig. 3.** Loss of daptomycin activity in supernatant is not due to antibiotic binding to bacteria.

446 (a) percentage survival of *E. faecalis* OG1X incubated with various concentrations of

447 daptomycin (dapt) or Bodipy-daptomycin (Bodipy-dapt) for 8 h. (b) relative percentage

448 daptomycin activity in culture supernatants described in (a). (c) binding of Bodipy-daptomycin

449 to *S. aureus* or *E. faecalis* OG1X after 8 h incubation in media containing the indicated

450 concentration of the labelled antibiotic. (d) quantification of Bodipy-daptomycin (RFU)

451 remaining in culture supernatants from *S. aureus* or *E. faecalis* OG1X, after 8 h incubation with

452 Bodipy-daptomycin as described in (c) \* indicates significantly different from 0 h time point.

453 (e) relative percentage activity of daptomycin (5 µg ml<sup>-1</sup>) activity in TSB only (TSB + dapt), in

454 the supernatant from *E. faecalis* incubated with daptomycin for 8 h (s/n) and after the addition

455 of 5 µg ml<sup>-1</sup> daptomycin to the supernatant from *E. faecalis* incubated with daptomycin for 8

456 h (s/n + dapt).

457 Data in (d) and (e) were analysed by a two-way ANOVA with Tukey's post-hoc test. Graphs

458 show the mean average and, where shown, error bars represent the standard deviation of the

459 mean. For each panel \*P<0.05.
